# Supplementary material for: Computational analysis of binding between benzamide-based derivatives and Abl wt and T315I mutant kinases
Source: Royal Society of Chemistry journal article supplement (doi:10.1039/c6ra19494j), 2016-01-01
Supplement: c6ra19494j1.pdf [file c6ra19494j1.pdf]

Electronic Supplementary Material (ESI) for RSC advances.

## **Computational analysis of binding between benzamide-based derivatives and Abl wt and T315I mutant kinases**

Shengfu Zhou,<sup>a</sup> Shepei Tan,<sup>a</sup> Danqing Fang,<sup>b</sup> Rong Zhang,<sup>a</sup> WeicongLin,<sup>a</sup> Wenjuan Wu<sup>\*a</sup> and Kangcheng Zheng<sup>c</sup>

<sup>a</sup>: Department of Physical Chemistry, College of Pharmacy, Guangdong Pharmaceutical University, Guangzhou 510006, China. E-mail: wuwenjuan83@126.com; Tel: +86 20 39352119

<sup>b</sup>: Department of Cardiothoracic Surgery, Affiliated Second Hospital of Guangzhou Medical University, Guangzhou 510260, China

<sup>c</sup>: School of Chemistry and Chemical Engineering, Sun Yat-Sen University, Guangzhou 510275, China

## **Electronic Supplementary Information**

### **Table of Contents**

Supplementary tables (Table S1-S2)

S2-S6

**Table S1** Molecular structure of compounds with their experimental activities.

| No. | Het                                                                                 | R <sub>1</sub>                                                                      | R <sub>2</sub> | R <sub>3</sub> | IC <sub>50</sub> (nM) |           |
|-----|-------------------------------------------------------------------------------------|-------------------------------------------------------------------------------------|----------------|----------------|-----------------------|-----------|
|     |                                                                                     |                                                                                     |                |                | Abl_wt                | Abl_T315I |
| 1   | 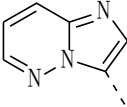   |    | H              | Me             | 2.67                  | 92.2      |
| 2*  |    |    | H              | Me             | 3.44                  | 95.7      |
| 3*  |    |    | H              | Me             | 2.25                  | 122       |
| 4   |    |    | H              | Me             | 0.52                  | 14.4      |
| 5   |  |  | H              | Me             | 0.78                  | 10.6      |
| 6*  |  |  | H              | Me             | 0.54                  | 25.2      |
| 7   |  |  | H              | Me             | 1.18                  | 29.6      |
| 8   |  |  | H              | Me             | 1.01                  | 89.4      |
| 9*  |  |  | H              | Me             | 5.96                  | 341       |
| 10  |  |  | H              | Me             | 12.8                  | 342       |
| 11  |  |  | H              | Me             | 19.1                  | 486       |

|     |  |  |   |    |      |      |
|-----|--|--|---|----|------|------|
| 12  |  |  | H | Me | 1629 | 2130 |
| 13  |  |  | H | Me | 22.6 | 206  |
| 14  |  |  | H | Me | 0.69 | 1.22 |
| 15  |  |  | H | Me | 302  | 334  |
| 16  |  |  | H | Me | 17.8 | 250  |
| 17* |  |  | H | Me | 0.60 | 1.12 |
| 18  |  |  | H | Me | 0.52 | 2.18 |
| 19  |  |  | H | Me | 0.72 | 31.5 |
| 20  |  |  | H | Me | 0.52 | 5.09 |
| 21* |  |  | H | Me | 0.45 | 14.2 |
| 22  |  |  | H | Me | 2.56 | 272  |
| 23  |  |  | H | Me | 1.42 | 32.8 |
| 24  |  |  | H | Me | 0.45 | 0.94 |

|     |                                                                                     |                                                                                     |                                                                                     |                                                                                       |      |      |
|-----|-------------------------------------------------------------------------------------|-------------------------------------------------------------------------------------|-------------------------------------------------------------------------------------|---------------------------------------------------------------------------------------|------|------|
| 25  | 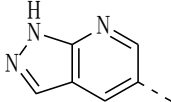   |    | H                                                                                   | Me                                                                                    | 0.52 | 18.0 |
| 26  |    |    | H                                                                                   | Me                                                                                    | 0.33 | 11.4 |
| 27  |    |    | H                                                                                   | Me                                                                                    | 0.41 | 18.7 |
| 28* |    | H                                                                                   |   | Me                                                                                    | 1.66 | 12.7 |
| 29* |    | H                                                                                   |   | Me                                                                                    | 1.03 | 10.6 |
| 30* |   | H                                                                                   |  | Me                                                                                    | 1.94 | 7.93 |
| 31  |  |  | H                                                                                   | H                                                                                     | 1.01 | 38.9 |
| 32* |  |  | H                                                                                   | F                                                                                     | 0.42 | 9.83 |
| 33  |  |  | H                                                                                   | Cl                                                                                    | 0.36 | 0.98 |
| 34  |  |  | H                                                                                   | Br                                                                                    | 0.70 | 1.94 |
| 35  |  |  | H                                                                                   | Et                                                                                    | 0.98 | 38.0 |
| 36  |  |  | H                                                                                   |  | 15.0 | 659  |
| 37  |  |  | H                                                                                   |  | 66.0 | 130  |

Compounds with "\*" are included in the test set.

**Table S2** The actual  $p/C_{50}$ , predicted  $p/C_{50}$  and their residuals of the studied compounds for CoMSIA analyses.

| No.                 | CoMSIA ( Abl_wt) |                  |        | CoMSIA (Abl_T315I) |                  |       |
|---------------------|------------------|------------------|--------|--------------------|------------------|-------|
|                     | Expt. $p/C_{50}$ | Pred. $p/C_{50}$ | Res. * | Expt. $p/C_{50}$   | Pred. $p/C_{50}$ | Res.  |
| <b>Training set</b> |                  |                  |        |                    |                  |       |
| <b>1</b>            | 8.57             | 8.45             | 0.12   | 7.04               | 7.06             | -0.02 |
| <b>4</b>            | 9.28             | 8.95             | 0.34   | 7.84               | 7.87             | -0.03 |
| <b>5</b>            | 9.11             | 8.98             | 0.13   | 7.97               | 7.96             | 0.01  |
| <b>7</b>            | 8.93             | 8.99             | -0.07  | 7.53               | 7.50             | 0.03  |
| <b>8</b>            | 9.00             | 9.22             | -0.23  | 7.05               | 7.15             | -0.10 |
| <b>10</b>           | 7.89             | 8.32             | -0.43  | 6.47               | 6.37             | 0.10  |
| <b>11</b>           | 7.72             | 7.72             | 0.00   | 6.31               | 6.30             | 0.01  |
| <b>12</b>           | 5.79             | 6.05             | -0.26  | 5.67               | 5.66             | 0.01  |
| <b>13</b>           | 7.65             | 7.89             | -0.25  | 6.69               | 6.63             | 0.06  |
| <b>14</b>           | 9.16             | 9.03             | 0.13   | 8.91               | 8.86             | 0.05  |
| <b>15</b>           | 6.52             | 6.91             | -0.39  | 6.48               | 6.52             | -0.04 |
| <b>16</b>           | 7.75             | 8.03             | -0.28  | 6.60               | 6.59             | 0.01  |
| <b>18</b>           | 9.28             | 9.24             | 0.04   | 8.66               | 8.76             | -0.10 |
| <b>19</b>           | 9.14             | 8.95             | 0.20   | 7.50               | 7.62             | -0.12 |
| <b>20</b>           | 9.28             | 9.42             | -0.13  | 8.29               | 8.22             | 0.07  |
| <b>22</b>           | 8.59             | 8.47             | 0.12   | 6.57               | 6.59             | -0.02 |
| <b>23</b>           | 8.85             | 8.87             | -0.02  | 7.48               | 7.52             | -0.04 |
| <b>24</b>           | 9.35             | 8.81             | 0.53   | 9.03               | 8.86             | 0.17  |
| <b>25</b>           | 9.28             | 9.32             | -0.04  | 7.74               | 7.75             | -0.01 |
| <b>26</b>           | 9.48             | 9.38             | 0.10   | 7.94               | 7.82             | 0.12  |
| <b>27</b>           | 9.39             | 9.04             | 0.35   | 7.73               | 7.87             | -0.14 |
| <b>31</b>           | 9.00             | 8.88             | 0.11   | 7.41               | 7.50             | -0.09 |
| <b>33</b>           | 9.44             | 9.15             | 0.30   | 9.01               | 8.99             | 0.02  |
| <b>34</b>           | 9.15             | 8.96             | 0.20   | 8.71               | 8.67             | 0.04  |
| <b>35</b>           | 9.01             | 8.76             | 0.24   | 7.42               | 7.50             | -0.08 |
| <b>36</b>           | 7.82             | 7.89             | -0.07  | 6.18               | 6.06             | 0.12  |
| <b>37</b>           | 7.18             | 7.40             | -0.22  | 6.89               | 6.89             | 0.00  |
| <b>Test set</b>     |                  |                  |        |                    |                  |       |
| <b>2</b>            | 8.46             | 7.90             | 0.56   | 7.55               | 7.02             | 0.53  |
| <b>3</b>            | 8.65             | 8.99             | -0.34  | 7.45               | 6.91             | 0.54  |
| <b>6</b>            | 9.27             | 9.35             | -0.08  | 7.52               | 7.60             | -0.08 |
| <b>9</b>            | 8.22             | 8.20             | 0.02   | 7.05               | 6.47             | 0.58  |
| <b>17</b>           | 9.22             | 9.41             | -0.19  | 8.40               | 8.95             | -0.55 |
| <b>21</b>           | 9.35             | 9.18             | 0.17   | 7.77               | 7.85             | -0.08 |
| <b>28</b>           | 8.78             | 8.83             | -0.05  | 8.05               | 7.90             | 0.15  |
| <b>29</b>           | 8.99             | 9.31             | -0.32  | 8.21               | 7.97             | 0.24  |
| <b>30</b>           | 8.71             | 8.94             | -0.23  | 7.99               | 8.10             | -0.11 |
| <b>32</b>           | 9.38             | 9.14             | 0.24   | 7.65               | 8.01             | -0.36 |

$$* \text{Res} = \text{Expt. } p/C_{50} - \text{Pred. } p/C_{50}$$
